# Supplementary material for: Genome-Wide Association Study for Agronomic Traits in Wild Soybean (Glycine soja)
Source: MDPI journal article supplement (doi:10.3390/agronomy13030739), 2023-03-01
Supplement: s1 [file s1]

Table S1. Country of origin for the 203 wild soybean accessions assessed in this study.

| Sample  | Accession | Country | Sample  | Accession   | Country |
|---------|-----------|---------|---------|-------------|---------|
| WC1-003 | YWS 94    | Korea   | WC2-091 | GWS-0945    | Korea   |
| WC1-021 | YWS 67    | Korea   | WC2-092 | GWS-0898    | Korea   |
| WC1-024 | 7402-46   | Korea   | WC2-095 | GWS-0642    | Korea   |
| WC1-027 | YWS 106   | China   | WC2-096 | GWS-1256    | Korea   |
| WC1-031 | 7402-18   | Korea   | WC2-097 | GWS-1101    | Korea   |
| WC1-032 | CHN57     | China   | WC2-102 | GWS-1108    | Korea   |
| WC1-035 | CHN2      | China   | WC2-104 | GWS-0906    | Korea   |
| WC1-036 | YWS1270   | Korea   | WC2-106 | GWS-1764    | China   |
| WC1-045 | YWS 74    | Korea   | WC2-107 | GWS-0942    | Korea   |
| WC1-053 | YWS 16    | Korea   | WC2-109 | GWS-0968    | Korea   |
| WC1-062 | YWS 125   | Unknown | WC2-110 | GWS-0003    | Korea   |
| WC1-077 | 74052-5   | Korea   | WC2-113 | GWS-1226    | Korea   |
| WC1-089 | 7402-29   | Korea   | WC2-114 | GWS-2343    | China   |
| WC1-116 | 7402-6    | Korea   | WC2-116 | GWS-0222    | Korea   |
| WC1-123 | YWS269    | Korea   | WC2-118 | GWS-1782    | China   |
| WC1-125 | YWS 138   | Korea   | WC2-119 | GWS-0057    | Korea   |
| WC1-127 | YWS1573   | Korea   | WC2-120 | GWS-0458    | Korea   |
| WC1-129 | PI366121  | Japan   | WC2-121 | GWS-0702    | Korea   |
| WC1-138 | YWS521    | Korea   | WC2-122 | GWS-0344    | Korea   |
| WC1-146 | YWS678    | Korea   | WC2-125 | GWS-0913    | Korea   |
| WC1-150 | YWS502    | Korea   | WC2-126 | GWS-0394    | Korea   |
| WC1-151 | YWS238    | Korea   | WC2-129 | GWS-0946    | Korea   |
| WC1-155 | YWS1407   | Korea   | WC2-130 | GWS-0306    | Korea   |
| WC1-158 | CHN24     | China   | WC2-132 | GWS-0819    | Korea   |
| WC1-160 | YWS1593   | Korea   | WC2-133 | GWS-1029    | Korea   |
| WC1-163 | YWS1294   | Korea   | WC2-134 | GWS-1063    | Korea   |
| WC1-164 | YWS 93    | Korea   | WC2-137 | GWS-0065    | Korea   |
| WC1-174 | YWS 151   | Korea   | WC2-139 | GWS-0401    | Korea   |
| WC1-177 | YWS 13    | Korea   | WC2-140 | GWS-0303    | Korea   |
| WC1-181 | YWS495    | Korea   | WC2-141 | GWS-1752    | China   |
| WC1-188 | 7402-23   | Korea   | WC2-146 | GWS-0520    | Korea   |
| WC1-199 | YWS1308   | Korea   | WC2-148 | GWS-0507    | Korea   |
| WC1-201 | YWS 80    | Korea   | WC2-150 | GWS-0830    | Korea   |
| WC1-202 | YWS1412   | Korea   | WC2-153 | GWS-0926    | Korea   |
| EE2-001 | GWS-0258  | Korea   | WC2-155 | GWS-0230    | Korea   |
| EE2-002 | GWS-0397  | Korea   | WC2-157 | GWS-1446    | Korea   |
| EE2-003 | GWS-0998  | Korea   | WC2-159 | GWS-0940    | Korea   |
| EE2-004 | GWS-1221  | Korea   | WC2-160 | GWS-0777    | Korea   |
| EE2-005 | GWS-1223  | Korea   | WC2-164 | PI339871B-2 | Korea   |
| EE2-006 | GWS-1231  | Korea   | WC2-165 | GWS-0943    | Korea   |
| EE2-007 | GWS-1700  | Japan   | WC2-167 | GWS-0915    | Korea   |
| EE2-008 | GWS-1736  | China   | WC2-168 | GWS-0072    | Korea   |
| EE2-009 | GWS-1778  | China   | WC2-169 | GWS-0782    | Korea   |
| EE2-010 | GWS-1790  | China   | WC2-170 | GWS-0761    | Korea   |
| EE2-013 | IT178480  | Korea   | WC2-173 | GWS-0845    | Korea   |
| EE2-014 | IT182840  | Korea   | WC2-174 | GWS-0139    | Korea   |
| EE2-015 | IT182848  | Korea   | WC2-176 | GWS-1467    | Korea   |
| EE2-016 | IT182932  | Korea   | WC2-180 | GWS-0198    | Korea   |
| WC2-001 | GWS-1696  | Japan   | WC2-182 | GWS-0290    | Korea   |
| WC2-002 | GWS-1746  | China   | WC2-184 | GWS-0537    | Korea   |
| WC2-007 | GWS-1771  | China   | WC2-186 | GWS-1159    | Korea   |
| WC2-011 | GWS-0090  | Korea   | WC2-187 | WC2-187     | Korea   |
| WC2-013 | GWS-1784  | China   | WC2-189 | WC2-189     | Korea   |
| WC2-015 | IT182869  | Korea   | WC2-191 | WC2-191     | Korea   |
| WC2-019 | GWS-1190  | Korea   | WC2-193 | WC2-193     | Japan   |
| WC2-020 | IT162825  | Korea   | WC2-195 | WC2-195     | Korea   |

|         |             |         |         |         |       |
|---------|-------------|---------|---------|---------|-------|
| WC2-021 | GWS-0831    | Korea   | WC2-197 | WC2-197 | Korea |
| WC2-022 | GWS-1671    | Japan   | WC2-199 | WC2-199 | Korea |
| WC2-023 | GWS-1775    | China   | WC2-205 | WC2-205 | Korea |
| WC2-024 | GWS-0453    | Korea   | WC2-206 | WC2-206 | Korea |
| WC2-025 | GWS-1336    | Korea   | WC2-207 | WC2-207 | Korea |
| WC2-026 | GWS-1789    | China   | WC2-208 | WC2-208 | Korea |
| WC2-028 | GWS-1121    | Korea   | WC2-209 | WC2-209 | Korea |
| WC2-029 | GWS-1686    | Japan   | WC2-210 | WC2-210 | Korea |
| WC2-030 | GWS-1000    | Korea   | WC2-214 | WC2-214 | Korea |
| WC2-032 | GWS-0794    | Korea   | WC2-217 | WC2-217 | Korea |
| WC2-033 | GWS-1774    | China   | WC2-220 | WC2-220 | Korea |
| WC2-037 | GWS-0295    | Korea   | WC2-224 | WC2-224 | Korea |
| WC2-039 | GWS-0393    | Korea   | WC2-226 | WC2-226 | Korea |
| WC2-043 | PI507800B-1 | Russia  | WC2-230 | WC2-230 | Korea |
| WC2-044 | GWS-0846    | Korea   | WC2-233 | WC2-233 | Japan |
| WC2-045 | GWS-1748    | China   | WC2-234 | WC2-234 | Korea |
| WC2-046 | GWS-0002    | Korea   | WC2-241 | WC2-241 | Korea |
| WC2-048 | GWS-1131    | Korea   | WC2-253 | WC2-253 | Korea |
| WC2-050 | GWS-1346    | Korea   | WC2-261 | WC2-261 | Korea |
| WC2-052 | GWS-0556    | Korea   | WC2-264 | WC2-264 | Korea |
| WC2-053 | GWS-0976    | Korea   | WC2-265 | WC2-265 | Korea |
| WC2-054 | GWS-0973    | Korea   | WC2-269 | WC2-269 | Japan |
| WC2-056 | GWS-1681    | Japan   | WC2-270 | WC2-270 | Korea |
| WC2-057 | GWS-1487    | Korea   | WC2-272 | WC2-272 | Korea |
| WC2-059 | GWS-0614    | Korea   | WC2-274 | WC2-274 | Korea |
| WC2-060 | GWS-0376    | Korea   | WC2-281 | WC2-281 | Korea |
| WC2-061 | GWS-1783    | China   | WC2-288 | WC2-288 | Korea |
| WC2-063 | GWS-0842    | Korea   | WC2-290 | WC2-290 | Korea |
| WC2-064 | GWS-0403    | Korea   | WC2-292 | WC2-292 | Korea |
| WC2-065 | GWS-0565    | Korea   | WC2-295 | WC2-295 | Korea |
| WC2-066 | GWS-1698    | Japan   | WC2-298 | WC2-298 | Korea |
| WC2-068 | GWS-0320    | Korea   | WC2-312 | WC2-312 | Korea |
| WC2-069 | GWS-1742    | China   | WC2-313 | WC2-313 | Korea |
| WC2-070 | GWS-0741    | Korea   | WC2-325 | WC2-325 | Korea |
| WC2-075 | GWS-0934    | Unknown | WC2-338 | WC2-338 | Korea |
| WC2-077 | GWS-1249    | Korea   | WC2-340 | WC2-340 | Korea |
| WC2-078 | GWS-1178    | Korea   | WC2-341 | WC2-341 | Korea |
| WC2-080 | GWS-1785    | China   | WC2-345 | WC2-345 | Korea |
| WC2-081 | GWS-0488    | Korea   | WC2-352 | WC2-352 | Korea |
| WC2-082 | GWS-0059    | Korea   | WC2-355 | WC2-355 | Korea |
| WC2-083 | GWS-1055    | Korea   | WC2-363 | WC2-363 | Korea |
| WC2-084 | GWS-1409    | Korea   | WC2-368 | WC2-368 | Korea |
| WC2-086 | GWS-0463    | Korea   | WC2-372 | WC2-372 | Korea |
| WC2-087 | GWS-0657    | Korea   | WC2-376 | WC2-376 | Korea |
| WC2-088 | GWS-1725    | Japan   |         |         |       |
| WC2-089 | GWS-1787    | China   |         |         |       |
| WC2-090 | GWS-0963    | Korea   |         |         |       |

---
